# Supplementary material
Source: Springer Nature journal article supplement (https://www.springermedizin.de/resource/supplementary/12943_2013_1223_MOESM2_ESM.pdf/9552382)

**A**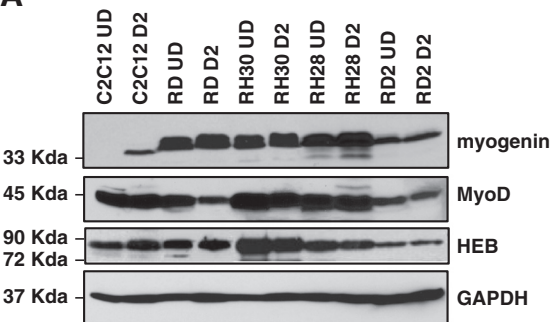**B**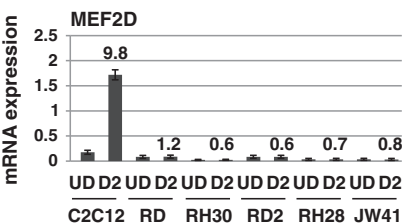**C**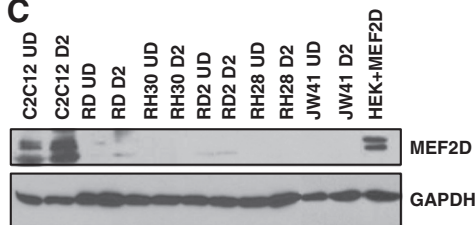**D**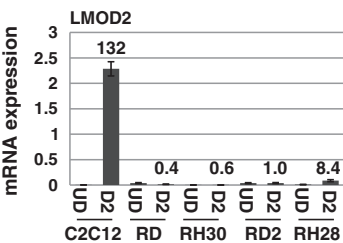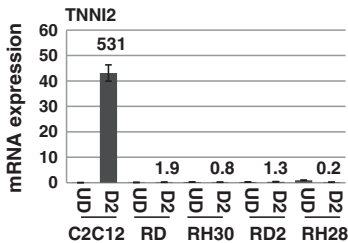**mRNA expression**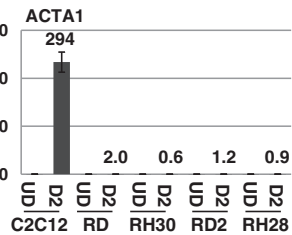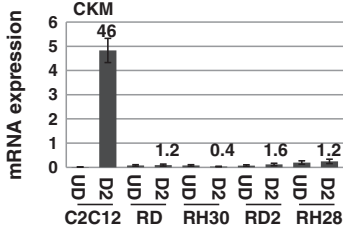

Supplement: MOESM2 [file 9552382]
